# Supplementary material for: Microwave-assisted synthesis of Bi2Se3ultrathin nanosheets and its electrical conductivities
Source: Royal Society of Chemistry journal article supplement (doi:10.1039/c4ce00004h), 2014-01-01
Supplement: c4ce00004h1.pdf [file c4ce00004h1.pdf]

## Electronic Supplementary Information

### Microwave-assisted synthesis of $\text{Bi}_2\text{Se}_3$ ultrathin nanosheets and its electrical conductivities

Haiming Xu,<sup>a</sup> Gang Chen,<sup>\*a</sup> Rencheng Jin,<sup>b</sup> Dahong Chen,<sup>a</sup> Yu Wang,<sup>a</sup> Jian Pei,<sup>a</sup>  
Yongqiang Zhang,<sup>a</sup> Chunshuang Yan<sup>a</sup> and Zhuangzhuang Qiu<sup>a</sup>

<sup>a</sup>Department of Chemistry, Harbin Institute of Technology, Harbin 150001, P. R. China.

<sup>b</sup>School of Chemistry & Materials Science, Ludong University, 186 Hongqi Road, Yantai, Shandong Province 264025, P. R. China

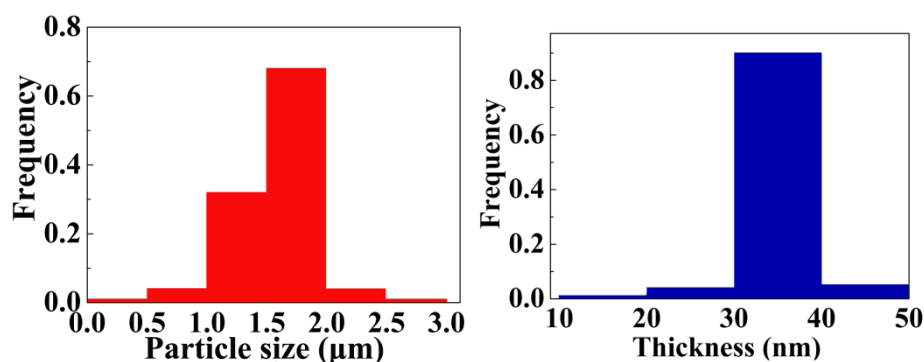

**Fig. S1** The diameter (red) and thickness (blue) size distribution of the as-prepared samples
